# Supplementary material
Source: PubMed Central journal article supplement (PMC4505931)
Supplement: NIHMS638262-supplement-125_2014_3419_MOESM1_ESM.pdf [file NIHMS638262-supplement-125_2014_3419_MOESM1_ESM.pdf]

**ESM Table 1.** Baseline characteristics of participants by genotype

|                                                         | RR (n=23)                  | RW (n=25)                  | WW (n=7)                   | P value |
|---------------------------------------------------------|----------------------------|----------------------------|----------------------------|---------|
| Age, yr                                                 | 52 (10)                    | 52 (10)                    | 53 (10)                    | 0.99    |
| Female, n (%)                                           | 15 (65)                    | 11 (44)                    | 5 (71)                     | 0.28    |
| BMI, kg/m <sup>2</sup>                                  | 29.8 (25.9, 33.2)          | 25.9 (24.2, 29.1)          | 28.8 (23.3, 36.7)          | 0.05    |
| Fasting glucose, mmol/l                                 | 5.51 (0.47)                | 5.31 (5.08, 102.18)        | 5.37 (4.89, 5.90)          | 0.59    |
| Fasting insulin, pmol/l                                 | 96.54 (61.81, 120.84)      | 62.51 (39.68, 91.17)       | 79.25 (63.93, 124.20)      | 0.11    |
| Ln HOMA-IR                                              | 1.13 (0.78, 1.47)          | 0.78 (0.35, 1.23)          | 1.00 (0.71, 1.46)          | 0.16    |
| Fasting proinsulin, pmol/l                              | 9.7 (6.9, 13.2)            | 8.2 (5.7, 13.0)            | 14.0 (9.2, 17.8)           | 0.26    |
| Fasting C-peptide, nmol/l                               | 0.46 (0.37, 0.60)          | 0.45 (0.23, 0.64)          | 0.68 (0.40, 1.03)          | 0.20    |
| Fasting proinsulin:insulin                              | 0.79 (0.59, 1.01)          | 1.04 (0.78, 1.34)          | 1.00 (0.66, 1.27)          | 0.20    |
| Fasting C-peptide:insulin, nmol/pmol                    | 0.11 (0.08, 0.13)          | 0.14 (0.10, 0.18)          | 0.15 (0.13, 0.18)          | 0.058   |
| Insulin AUC <sub>5min</sub> , pmol min l <sup>-1</sup>  | 1583.46 (1150.79, 1934.88) | 837.57 (598.27, 1062.02)   | 1382.06 (948.11, 3338.67)  | 0.0014  |
| Insulin AUC <sub>10min</sub> , pmol min l <sup>-1</sup> | 3816.97 (2639.79, 4359.38) | 2132.12 (1661.21, 2574.50) | 3362.07 (2484.54, 7311.70) | 0.001   |
| Proinsulin:insulin <sub>5min</sub>                      | 0.22 (0.18 to 0.29)        | 0.31 (0.24, 0.46)          | 0.26 (0.16, 0.31)          | 0.01    |
| Proinsulin:insulin <sub>10min</sub>                     | 0.40 (0.30 to 0.48)        | 0.52 (0.42, 0.70)          | 0.41 (0.29, 0.48)          | 0.004   |
| C-peptide <sub>5min</sub> , nmol/l                      | 1.43 (0.93, 1.64)          | 1.12 (0.80, 1.52)          | 1.47 (1.28, 2.44)          | 0.12    |
| C-peptide <sub>10min</sub> , nmol/l                     | 1.24 (0.81, 1.45)          | 1.05 (0.67, 1.53)          | 1.52 (1.18, 2.18)          | 0.09    |
| C-peptide:insulin <sub>5min</sub> , nmol/pmol           | 0.054 (0.045, 0.067)       | .066 (0.059, 0.095)        | 0.057 (0.047, 0.081)       | 0.015   |
| C-peptide:insulin <sub>10min</sub> , nmol/pmol          | 0.079 (0.062, 0.10)        | .099 (0.088, 0.14)         | 0.090 (0.072, 0.098)       | 0.003   |
| Serum zinc, μmol/l                                      | 10.6 (9.6, 12.1)           | 10.7 (9.95, 11.63)         | 9.5 (8.72, 11.17)          | 0.23    |

BMI, body mass index; HOMA-IR, Homeostasis Model of Assessment – Insulin Resistance

Median (p25, p75) BMI, insulin, ln HOMA-IR, proinsulin, C-peptide, proinsulin:insulin, C-peptide:insulin and zinc shown; mean (SD) glucose shown.

Medians compared using Kruskal-Wallis tests, means compared using analysis of variance, and proportions compared using Fisher's exact test.
