# Supplementary material
Source: PubMed Central journal article supplement (PMC4505931)
Supplement: NIHMS638262-supplement-125_2014_3419_MOESM2_ESM.pdf [file NIHMS638262-supplement-125_2014_3419_MOESM2_ESM.pdf]

**ESM Table 2.** Zinc, insulin, proinsulin and C-peptide:insulin after 14 days of zinc supplementation

|                                                                                    | <b>RR (n=23)</b>             | <b>RW (n=25)</b>              | <b>WW (n=7)</b>               |
|------------------------------------------------------------------------------------|------------------------------|-------------------------------|-------------------------------|
| <b>Fasting serum zinc, <math>\mu\text{mol/l}</math></b>                            | 13.2 (12.6, 14.5)            | 13.6 (12.2, 15.8)             | 12.2 (11.6, 14.7)             |
| <b>Insulin AUC<sub>5min</sub>, <math>\text{pmol min l}^{-1}</math></b>             | 1309.83 (945.21, 2200.18)    | 1038.28 (699.36, 1861.95)     | 1529.29 (1238.29, 2652.30)    |
| Relative change from baseline, ratio (95% CI)                                      | 0.91 (0.78 to 1.07); P=0.26  | 1.20 (1.02 to 1.39); P =0.021 | 1.01 (0.73 to 1.30); P =0.96  |
| Relative change vs. RR, ratio (95% CI)                                             | reference                    | 1.31 (1.05 to 1.65); P =0.021 | 1.10 (0.80 to 1.54); P =0.54  |
| <b>Insulin AUC<sub>10min</sub>, <math>\text{pmol min l}^{-1}</math></b>            | 3173.87 (2277.27, 4864.28)   | 2664.80 (1653.60, 3732.94)    | 3684.32 (3410.69, 6150.49)    |
| Relative change from baseline, ratio (95% CI)                                      | 0.98 (0.86 to 1.09); P =0.67 | 1.17 (1.04 to 1.31); P =0.007 | 1.05 (0.82 to 1.27); P =0.70  |
| Relative change vs. RR, ratio (95% CI)                                             | reference                    | 1.20 (1.01 to 1.43); P =0.037 | 1.07 (0.84 to 1.38); P =0.58  |
| <b>Proinsulin:insulin<sub>5min</sub></b>                                           | 0.24 (0.20, 0.29)            | 0.27 (0.22, 0.40)             | 0.21 (0.18, 0.30)             |
| Relative change from baseline, ratio (95% CI)                                      | 1.08 (0.96 to 1.19); P =0.17 | 0.89 (0.80 to 0.99); P =0.035 | 0.99 (0.80 to 1.18); P =0.92  |
| Relative change vs. RR, ratio (95% CI)                                             | reference                    | 0.83 (0.71 to 0.97); P =0.019 | 0.92 (0.74 to 1.15); P =0.45  |
| <b>Proinsulin:insulin<sub>10min</sub></b>                                          | 0.38 (0.33, 0.45)            | 0.46 (0.37, 0.67)             | 0.27 (0.25, 0.38)             |
| Relative change from baseline, ratio (95% CI)                                      | 1.00 (0.89 to 1.11); P =0.98 | 0.90 (0.80 to 1.00); P =0.076 | 0.73 (0.58 to 0.87); P =0.002 |
| Relative change vs. RR, ratio (95% CI)                                             | reference                    | 0.90 (0.76 to 1.07); P =0.23  | 0.72 (0.57 to 0.92); P =0.009 |
| <b>C-peptide:insulin<sub>5min</sub>, <math>\text{nmol/pmol}^{\text{a}}</math></b>  | 0.057 (0.047, 0.072)         | 0.063 (0.056, 0.075)          | 0.051 (0.043, 0.066)          |
| Change from baseline, ratio (95% CI)                                               | 1.06 (0.98, 1.16); P=0.15    | 0.93 (0.86, 1.01); P =0.077   | 0.88 (0.76, 1.02); P =0.092   |
| Relative change vs. RR, ratio (95% CI)                                             | reference                    | 0.87 (0.77, 0.99); P =0.033   | 0.83 (0.69, 0.99); P =0.038   |
| <b>C-peptide:insulin<sub>10min</sub>, <math>\text{nmol/pmol}^{\text{b}}</math></b> | 0.078 (0.060, 0.11)          | 0.095 (0.078, 0.13)           | 0.074 (0.053, 0.083)          |
| Change from baseline, ratio (95% CI)                                               | 1.01 (0.89 to 1.14); P=0.90  | 0.97 (0.86, 1.10); P =0.66    | 0.69 (0.56, 0.87); P =0.002   |
| Relative change vs. RR, ratio (95% CI)                                             | reference                    | 0.96 (0.80, 1.16); P =0.70    | 0.69 (0.53, 0.90); P =0.008   |

Median (p25, p75) zinc, AUC<sub>insulin</sub>, proinsulin:insulin, and C-peptide:insulin shown.

Relative change in AUC<sub>insulin</sub>, proinsulin:insulin adjusted for age, body mass index and fasting ln(Homeostasis Model of Assessment – Insulin Resistance).

Relative change in C-peptide:insulin adjusted for age, body mass index, fasting insulin, and fasting C-peptide.

<sup>a</sup> n=24 for CT genotype

<sup>b</sup> n=23 for CT genotype
