# Supplementary material
Source: PubMed Central journal article supplement (PMC4505931)
Supplement: NIHMS638262-supplement-125_2014_3419_MOESM3_ESM.pdf [file NIHMS638262-supplement-125_2014_3419_MOESM3_ESM.pdf]

**ESM Table 3.** Adverse events in the Zinc Insulin Pharmacogenetics Study

| <b>Adverse event</b>                                    | <b>N (%)</b>         |
|---------------------------------------------------------|----------------------|
| Serious adverse events                                  | 0 (0)                |
| Any gastrointestinal symptom                            | 13 (23) <sup>a</sup> |
| Gastrointestinal distress when zinc not taken with food | 5 (9)                |
| Heartburn                                               | 2 (4)                |
| Mild dizziness                                          | 2 (4)                |

<sup>a</sup>no difference in symptoms by genotype ( $p=0.10$  from Fisher's exact test)
