# Supplementary material
Source: PubMed Central journal article supplement (PMC4505931)
Supplement: NIHMS638262-supplement-125_2014_3419_MOESM4_ESM.pdf [file NIHMS638262-supplement-125_2014_3419_MOESM4_ESM.pdf]

**ESM Figure 1.** Flow of participants in the Zinc Insulin Pharmacogenetics Study

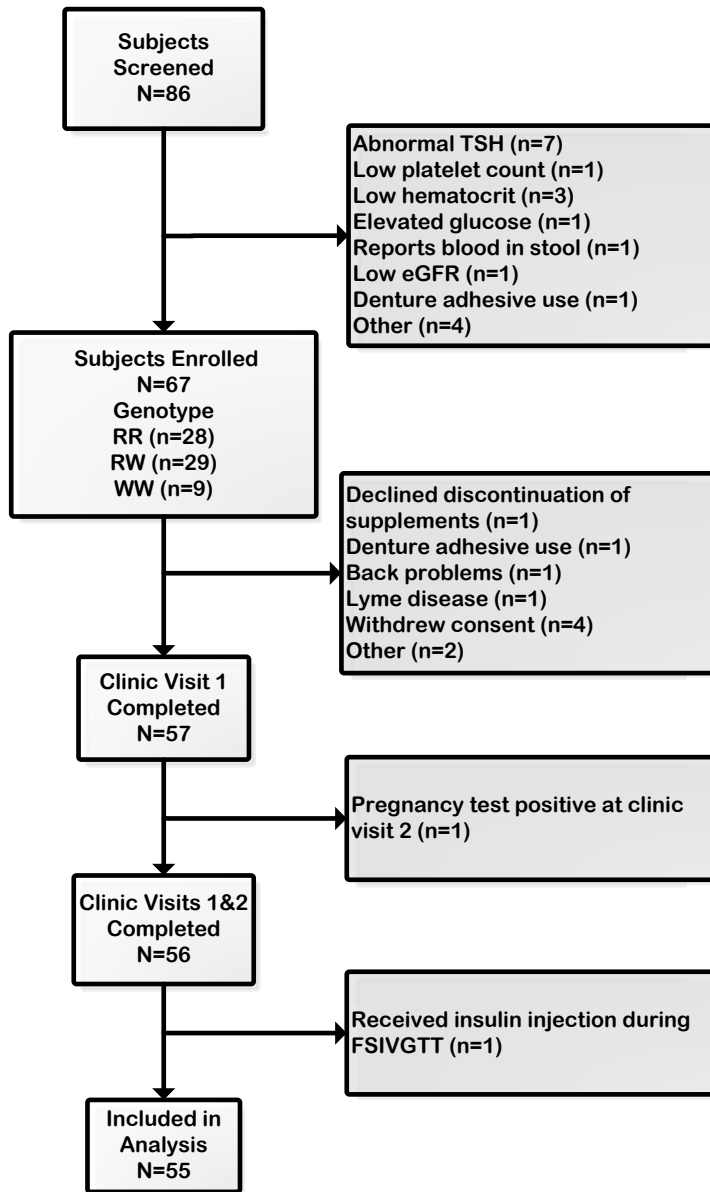

Abbreviations: TSH, thyroid stimulating hormone; eGFR, estimated glomerular filtration rate; FS-IVGTT, frequently-sampled intravenous glucose tolerance test
